# Supplementary material for: Chemical Mutagenesis and Fluorescence-Based High-Throughput Screening for Enhanced Accumulation of Carotenoids in a Model Marine Diatom Phaeodactylum tricornutum
Source: MDPI journal article supplement (doi:10.3390/md16080272), 2018-08-04
Supplement: s1 [file s1]

**Supplementary Table 3.** Tentative identification of different lipophilic compound expression in both WT and mutants.

a) Lipophilic compounds' differences between WT and EMS30;

| Marker | RT    |                                       |       |          |                                                                  |                             |     |
|--------|-------|---------------------------------------|-------|----------|------------------------------------------------------------------|-----------------------------|-----|
| No.    | Group | Supposed metabolite                   | (min) | m/z      | formula                                                          | adduct                      | ppm |
|        |       |                                       |       |          |                                                                  | [M+H-<br>H <sub>2</sub> O]+ |     |
| 1      | WT    | eicosasphinganine                     | 9.54  | 312.3287 | C <sub>20</sub> H <sub>43</sub> NO <sub>2</sub>                  |                             | 6   |
| 2      | WT    | Octadecanoic acid                     | 7.8   | 284.2979 | C <sub>18</sub> H <sub>39</sub> NO <sub>2</sub>                  | [M+H-<br>H <sub>2</sub> O]+ | 9   |
| 3      | WT    | Docosanamide                          | 11.03 | 340.3603 | C <sub>22</sub> H <sub>45</sub> NO                               | [M+H]+                      | 8   |
| 4      | WT    | DGCC(16:0/20:5)                       | 10.82 | 756.5796 | C <sub>46</sub> H <sub>79</sub> NO <sub>8</sub>                  | [M+H-<br>H <sub>2</sub> O]+ | 2   |
| 5      | EMS30 | Antheraxanthin                        | 13.47 | 607.3956 | C <sub>40</sub> H <sub>56</sub> O <sub>3</sub>                   | [M+Na]+                     | 28  |
| 6      | EMS30 | PA(P-16:0/20:4)                       | 13.48 | 663.4583 | C <sub>39</sub> H <sub>69</sub> O <sub>7</sub> P                 | [M+H-<br>H <sub>2</sub> O]+ | 24  |
| 7      | EMS30 | Ganoderic acid V                      | 13.48 | 551.3312 | C <sub>32</sub> H <sub>48</sub> O <sub>6</sub>                   | [M+Na]+                     | 5   |
| 8      | EMS30 | Hoslundin                             | 14.74 | 429.0912 | C <sub>23</sub> H <sub>18</sub> O <sub>7</sub>                   | [M+Na]+                     | 8   |
| 9      | EMS30 | PG(22:6/21:0)                         | 15.82 | 887.5728 | C <sub>49</sub> H <sub>85</sub> O <sub>10</sub> P                | [M+Na]+                     | 5   |
| 10     | EMS30 | Spectinomycin adenylate               | 14.73 | 684.205  | C <sub>24</sub> H <sub>36</sub> N <sub>7</sub> O <sub>13</sub> P | [M+Na]+                     | 7   |
| 11     | EMS30 | 4,4'-Sulfonylbisacetanilide<br>Benzyl | 14.72 | 355.0719 | C <sub>16</sub> H <sub>16</sub> N <sub>2</sub> O <sub>4</sub> S  | [M+Na]+                     | 1   |
| 12     | EMS30 | Dimethylphosphonoacetate              | 12    | 281.0555 | C <sub>11</sub> H <sub>15</sub> O <sub>5</sub> P                 | [M+Na]+                     | 2   |
| 13     | EMS30 | PG(22:6/21:0)                         | 15.49 | 887.5737 | C <sub>49</sub> H <sub>85</sub> O <sub>10</sub> P                | [M+Na]+                     | 5   |

b) Lipophilic compounds' differences between WT and EMS67;

| Marker | RT    |                             |       |          |                                                                  |                             |     |
|--------|-------|-----------------------------|-------|----------|------------------------------------------------------------------|-----------------------------|-----|
| No.    | Group | Supposed metabolite         | (min) | m/z      | formula                                                          | adduct                      | ppm |
|        |       |                             |       |          |                                                                  | [M+H-<br>H <sub>2</sub> O]+ |     |
| 1      | WT    | eicosasphinganine           | 9.54  | 312.3287 | C <sub>20</sub> H <sub>43</sub> NO <sub>2</sub>                  |                             | 6   |
| 2      | WT    | Docosanamide                | 11.03 | 340.3603 | C <sub>22</sub> H <sub>45</sub> NO                               | [M+H]+                      | 8   |
| 3      | WT    | N-Docosylacetamide          | 12.24 | 368.3927 | C <sub>24</sub> H <sub>49</sub> NO                               | [M+H]+                      | 11  |
| 4      | WT    | Ixocarpanolide              | 13.48 | 495.2662 | C <sub>28</sub> H <sub>40</sub> O <sub>6</sub>                   | [M+Na]+                     | 11  |
| 5      | WT    | 4,4'-Sulfonylbisacetanilide | 15.27 | 355.0704 | C <sub>16</sub> H <sub>16</sub> N <sub>2</sub> O <sub>4</sub> S  | [M+Na]+                     | 1   |
| 6      | WT    | Phe Cys Gly Leu             | 13.5  | 439.2021 | C <sub>20</sub> H <sub>30</sub> N <sub>4</sub> O <sub>5</sub> S  | [M+H]+                      | 7   |
| 7      | EMS67 | Hoslundin                   | 14.74 | 429.0921 | C <sub>23</sub> H <sub>18</sub> O <sub>7</sub>                   | [M+Na]+                     | 8   |
| 8      | EMS67 | PG(22:6/21:0)               | 15.82 | 887.5728 | C <sub>49</sub> H <sub>85</sub> O <sub>10</sub> P                | [M+Na]+                     | 5   |
| 9      | EMS67 | PG(22:6/21:0)               | 15.49 | 887.5737 | C <sub>49</sub> H <sub>85</sub> O <sub>10</sub> P                | [M+Na]+                     | 5   |
| 10     | EMS67 | PA(P-16:0/20:4)             | 13.48 | 663.4583 | C <sub>39</sub> H <sub>69</sub> O <sub>7</sub> P                 | [M+H-<br>H <sub>2</sub> O]+ | 24  |
| 11     | EMS67 | 4,4'-Sulfonylbisacetanilide | 14.72 | 355.0719 | C <sub>16</sub> H <sub>16</sub> N <sub>2</sub> O <sub>4</sub> S  | [M+Na]+                     | 1   |
| 12     | EMS67 | Antheraxanthin              | 13.47 | 607.3956 | C <sub>40</sub> H <sub>56</sub> O <sub>3</sub>                   | [M+Na]+                     | 28  |
| 13     | EMS67 | Chlorophyllide              | 14.02 | 615.2473 | C <sub>35</sub> H <sub>34</sub> MgN <sub>4</sub> O <sub>5</sub>  | [M+H]+                      | 3   |
| 14     | EMS67 | Spectinomycin adenylate     | 14.73 | 684.205  | C <sub>24</sub> H <sub>36</sub> N <sub>7</sub> O <sub>13</sub> P | [M+Na]+                     | 7   |
| 15     | EMS67 | Palmitamide<br>Benzyl       | 5.9   | 256.2659 | C <sub>16</sub> H <sub>33</sub>                                  | [M+H]+                      | 9   |
| 16     | EMS67 | Dimethylphosphonoacetate    | 12    | 281.0555 | C <sub>11</sub> H <sub>15</sub> O <sub>5</sub> P                 | [M+Na]+                     | 2   |

|    |       |                      |       |          |            |             |    |
|----|-------|----------------------|-------|----------|------------|-------------|----|
| 17 | EMS67 | Anthemis glycoside A | 14.96 | 832.2451 | C39H49NO21 | [M+H-2H2O]+ | 26 |
|----|-------|----------------------|-------|----------|------------|-------------|----|

PC abbreviated phosphatidylcholines, PI abbreviated glycerophosphoinositols; PG abbreviated glycerophosphoglycerols; PA abbreviated glycerophosphates.
