# Supplementary material for: Chemical Mutagenesis and Fluorescence-Based High-Throughput Screening for Enhanced Accumulation of Carotenoids in a Model Marine Diatom Phaeodactylum tricornutum
Source: MDPI journal article supplement (doi:10.3390/md16080272), 2018-08-04
Supplement: s1 [file s1]

| Equations |                                                                                                       |                  |
|-----------|-------------------------------------------------------------------------------------------------------|------------------|
| a)        | $y=0.0025x+0.0123$<br>(x: relative chlorophyll a fluorescence intensity; y: total carotenoid content) | ( $R^2=0.8687$ ) |
| b)        | $y=0.0021x+0.1501$<br>(x: relative chlorophyll a fluorescence intensity; y: total carotenoid content) | ( $R^2=0.7395$ ) |
| c)        | $y=0.018x-0.3253$<br>(x: relative Nile red fluorescence intensity; y: total carotenoid content)       | ( $R^2=0.6356$ ) |
| d)        | $y=0.0081x+0.8609$<br>(x: relative Nile red fluorescence intensity; y: total carotenoid content)      | ( $R^2=0.3758$ ) |

**Supplementary Table 1:** Equations for the correlations of total carotenoids with chlorophyll a or lipids content (indicated by Nile red fluorescence intensity).
