# Supplementary material for: Chemical Mutagenesis and Fluorescence-Based High-Throughput Screening for Enhanced Accumulation of Carotenoids in a Model Marine Diatom Phaeodactylum tricornutum
Source: MDPI journal article supplement (doi:10.3390/md16080272), 2018-08-04
Supplement: s1 [file s1]

**Table S2.** Enzymatic reactions with the highest correlation with fluxes in the fucoxanthin production. The data was obtained through conducting various flux analysis in published iLB1025 model.

| Reaction                                            | Correlation | KEGG ID | EC       | Catalyst                                                                |
|-----------------------------------------------------|-------------|---------|----------|-------------------------------------------------------------------------|
| <b>Nucleotide metabolism: Pyrimidine metabolism</b> |             |         |          |                                                                         |
| TDSR_c                                              | 1.00        | R02016  | 1.8.1.9  | Thioredoxin-disulfide reductase                                         |
| OMPDC_c                                             | 1.00        | R00965  | 4.1.1.23 | Orotidine-5"-phosphate decarboxylase                                    |
| MDUMT_c                                             | 1.00        | R02101  | 2.1.1.45 | 5,10-Methylenetetrahydrofolate:dUMP C-methyltransferase                 |
| ASPCT_c                                             | 1.00        | R01397  | 2.1.3.2  | Aspartate carbamoyltransferase                                          |
| DHR_c                                               | -1.00       | R01993  | 3.5.2.3  | Dihydroorotase                                                          |
| ORPRT_c                                             | -1.00       | R01870  | 2.4.2.10 | Orotate phosphoribosyltransferase                                       |
| DHRDH_c                                             | 1.00        | R01867  | 1.3.98.1 | Dihydroorotate dehydrogenase (Fumarate)                                 |
| UTAL_c                                              | 0.98        | R00571  | 6.3.4.2  | UTP:ammonia ligase (ADP-forming)                                        |
| DCDT_c                                              | 0.81        | R02024  | 1.17.4.1 | 2'-Deoxycytidine diphosphate:oxidized-thioredoxin 2'-oxidoreductase     |
| ATDCM_c                                             | -0.61       | R01665  | 2.7.4.14 | ATP:dCMP phosphotransferase                                             |
| DCMAH_c                                             | 0.61        | R01663  | 3.5.4.12 | dCMP aminohydrolase                                                     |
| ITCY_c                                              | 0.26        | R00962  | 2.7.1.48 | ITP:cytidine 5"-phosphotransferase                                      |
| CMP_c                                               | 0.26        | R00511  | 3.1.3.5  | Cytidine-5"-monophosphate phosphohydrolase                              |
| DURIPP_c                                            | 0.15        | R02484  | 2.4.2.1  | Deoxyuridine phosphorylase                                              |
| UPRT_c                                              | -0.15       | R00966  | 2.4.2.9  | Uracil phosphoribosyltransferase                                        |
| NTD1_c                                              | 0.15        | R02102  | 3.1.3.5  | 2"-Deoxyuridine 5"-monophosphate phosphohydrolase                       |
|                                                     |             |         |          |                                                                         |
| <b>Nucleotide metabolism: Purine metabolism</b>     |             |         |          |                                                                         |
| DGOTO_c                                             | 0.64        | R02019  | 1.17.4.1 | 2'-Deoxyguanosine 5'-diphosphate:oxidized-thioredoxin 2'-oxidoreductase |

|                            |       |        |          |                                                                               |
|----------------------------|-------|--------|----------|-------------------------------------------------------------------------------|
| DAOTO_c                    | 0.56  | R02017 | 1.17.4.1 | 2'-Deoxyadenosine 5'-diphosphate:oxidized-thioredoxin 2'-<br>oxidoreductase   |
| AIAL_c                     | 0.21  | R04559 | 4.3.2.2  | 1-(5"-Phosphoribosyl)-5-amino-4-(N-succinocarboxamide)-imidazole<br>AMP-lyase |
| PRAIS_c                    | 0.21  | R04591 | 6.3.2.6  | Phosphoribosylaminoimidazolesuccinocarboxamide synthase                       |
| PRAIC_c                    | -0.21 | R04209 | 4.1.1.21 | Phosphoribosylaminoimidazole carboxylase                                      |
| ITPA_c                     | 0.20  | R00719 | 3.6.1.5  | ITP-apyrase                                                                   |
| DAMPH_c                    | -0.17 | R02088 | 3.1.3.5  | 2"-Deoxyadenosine 5"-monophosphate phosphohydrolase                           |
| ATDAM_c                    | 0.17  | R01547 | 2.7.4.3  | ATP:dAMP phosphotransferase                                                   |
| FPGFT_c                    | 0.16  | R04325 | 2.1.2.2  | Phosphoribosylglycinamide formyltransferase                                   |
| PPRGL_c                    | 0.16  | R04144 | 6.3.4.13 | Phosphoribosylamine-glycine ligase                                            |
| PRFGS_c                    | 0.16  | R04463 | 6.3.5.3  | Phosphoribosylformylglycinamide synthase                                      |
| PRDPAR_c                   | 0.16  | R01072 | 2.4.2.14 | 5-Phosphoribosylamine:diphosphate phospho-alpha-D-<br>ribosyltransferase      |
| PRFGCL_c                   | 0.16  | R04208 | 6.3.3.1  | Phosphoribosylformylglycinamide cyclo-ligase                                  |
| GPAR_c                     | 0.15  | R01229 | 2.4.2.7  | GMP:diphosphate 5-phospho-alpha-D-ribosyltransferase                          |
| PUNP3_c                    | 0.15  | R02147 | 2.4.2.1  | Purine-nucleoside phosphorylase (Guanosine)                                   |
| GMP5N                      | 0.15  | R01227 | 3.1.3.5  | GMP-5"-nucleotidase                                                           |
| XPPRT_c                    | -0.14 | R02142 | 2.4.2.8  | XMP:pyrophosphate phosphoribosyltransferase                                   |
| PUNP7_c                    | -0.14 | R02297 | 2.4.2.1  | Purine-nucleoside phosphorylase (Xanthosine)                                  |
| X5NT_c                     | -0.14 | R02719 | 3.1.3.5  | XMP-5"-nucleotidase                                                           |
| <b>Nitrogen metabolism</b> |       |        |          |                                                                               |

|                                                               |      |        |           |                                                          |
|---------------------------------------------------------------|------|--------|-----------|----------------------------------------------------------|
| NITR_c                                                        | 0.86 | R00794 | 1.7.1.1   | Nitrate reductase (NADH)                                 |
| NTRIR_h                                                       | 0.34 | R02016 | 1.8.1.9   | Nitrite reductase (NADPH), chloroplast                   |
| NOR_c                                                         | 0.25 | R00790 | 1.7.7.1   | Ferredoxin-Nitrite Reductase                             |
|                                                               |      |        |           |                                                          |
| <b>Nucleotide sugar metabolism</b>                            |      |        |           |                                                          |
| XYLE_c                                                        | 1.00 | R01473 | 5.1.3.5   | UDP-xylose 4-epimerase                                   |
| UDPRHMS_c                                                     | 1.00 |        |           | UDP-beta-L-rhamnose synthase                             |
| GDPMANST_c                                                    | 1.00 |        |           | GDP-mannose-3-sulftransferase                            |
| UDPGLDC_c                                                     | 1.00 |        |           | UDP-D-glucuronate decarboxylase                          |
|                                                               |      |        |           |                                                          |
| <b>Starch and sucrose metabolism</b>                          |      |        |           |                                                          |
| UGDH                                                          | 1.00 | R00286 | 1.1.1.22  | UDP-glucose 6-dehydrogenase                              |
|                                                               |      |        |           |                                                          |
| <b>Fructose and mannose metabolism</b>                        |      |        |           |                                                          |
| GFUCS_c                                                       | 1.00 | R05692 | 1.1.1.271 | GDP-L-fucose synthase                                    |
| GMAND_c                                                       | 1.00 | R00888 | 4.2.1.47  | GDP-D-mannose dehydratase                                |
|                                                               |      |        |           |                                                          |
| <b>Biosynthesis of steroids: Terpenoid backbone synthesis</b> |      |        |           |                                                          |
| GPPS_h                                                        | 1.00 | R01658 | 2.5.1.1   | geranyl pyrophosphate synthase, chloroplast              |
| CMK_h                                                         | 1.00 | R05634 | 2.7.1.148 | 4-(cytidine 5'-diphospho)-2-C-methyl-D-erythritol kinase |
| GGPS_h                                                        | 1.00 | R02061 | 2.5.1.29  | Geranylgeranyl diphosphate synthase                      |
| DXR_h                                                         | 1.00 | R05688 | 1.1.1.267 | 1-deoxy-D-xylulose-5-phosphate reductoisomerase          |
| MECDPS_h                                                      | 1.00 | R05637 | 4.6.1.12  | 2-C-methyl-D-erythritol 2,4-cyclodiphosphate synthase    |
| GGDR_h                                                        | 1.00 | R02063 | 1.3.1.83  | geranylgeranyl diphosphate reductase                     |

|                                             |       |                  |          |                                                                                |
|---------------------------------------------|-------|------------------|----------|--------------------------------------------------------------------------------|
| HMBDPO_h                                    | 1.00  | R08689           | 1.17.7.1 | 4-hydroxy-3-methylbut-2-en-1-yl-diphosphate:oxidized ferredoxin oxidoreductase |
| CMS_h                                       | 1.00  | R05633           | 2.7.7.60 | 2-C-methyl-D-erythritol 4-phosphate cytidyltransferase                         |
| FPPS_h                                      | 1.00  | R02003           | 2.5.1.10 | Farnesyl pyrophosphate synthase                                                |
| DXPS_h                                      | 0.73  | R05636           | 2.2.1.7  | 1-deoxy-D-xylulose 5-phosphate synthase                                        |
| IDS1_h                                      | 0.55  | R05884           | 1.17.1.2 | isopentenyl-diphosphate synthase                                               |
| IDIH_h                                      | 0.20  | R01123           | 5.3.3.2  | isopentenyl-diphosphate Delta-isomerase, chloroplast                           |
| <b>Carotenoid biosynthesis</b>              |       |                  |          |                                                                                |
| NOR_h                                       | -1.00 | R04800           | 1.3.5.6  | Neurosporene oxidoreductase                                                    |
| PSY_h                                       | 1.00  | R02065<br>R07270 | 2.5.1.32 | phytoene synthase                                                              |
| ZDS_h                                       | -1.00 | R04798           | 1.3.5.6  | zeta-carotene desaturase                                                       |
| BCAROXR_h                                   | 1.00  | R07558<br>R07559 |          | Beta-carotene, NADH:oxygen 3-oxidoreductase (zeaxanthin forming)               |
| NSY_h                                       | -1.00 | R06948           | 5.3.99.9 | Neoxanthin synthase                                                            |
| FXANS_h                                     | 1.00  |                  |          | Fucoxanthin synthase                                                           |
| PDS1_c                                      | 1.00  | R04786           | 1.3.5.5  | phytoene desaturase (1)                                                        |
| PDS2_h                                      | 1.00  | R04787           | 1.3.5.5  | phytoene desaturase (2)                                                        |
| LYCBC1_c                                    | -1.00 | R05341           | 5.5.1.19 | Lycopene cyclase (gamma-carotene producing)                                    |
| LYCBC2_h                                    | 1.00  | R03824           | 5.5.1.19 | Lycopene cyclase (beta-carotene producing)                                     |
| DIADINX_h                                   | 1.00  |                  |          | Diadinoxanthin synthase                                                        |
| <b>Porphyrin and chlorophyll metabolism</b> |       |                  |          |                                                                                |

|                                |       |        |            |                                                                             |
|--------------------------------|-------|--------|------------|-----------------------------------------------------------------------------|
| PPBNGD_h                       | -1.00 | R00084 | 2.5.1.61   | porphobilinogen deaminase                                                   |
| UPPS_h                         | 1.00  | R03165 | 4.2.1.75   | Uroporphyrinogen-III synthase                                               |
| MPOXR_h                        | 1.00  | R10068 | 1.14.13.81 | Magnesium-protoporphyrin-IX 13-monomethyl ester,NADPH:oxygen oxidoreductase |
| PPBNGS_h                       | 1.00  | R00036 | 4.2.1.24   | porphobilinogen synthase                                                    |
| PPPGO_h                        | 1.00  | R03222 | 1.3.3.4    | protoporphyrinogen IX oxidase                                               |
| CHLPAS_h                       | 1.00  | R06284 | 2.5.1.62   | Chlorophyll A synthase                                                      |
| CPPPGO_h                       | 1.00  | R03220 | 1.3.3.3    | coproporphyrinogen III oxidase (O2 required)                                |
| CHLPC1S_h                      | 1.00  |        |            | Chlorophyll C1 synthase                                                     |
| G1SAT_h                        | -1.00 | R02272 | 5.4.3.8    | glutamate-1-semialdehyde aminotransferase                                   |
| GLUTRR_h                       | 1.00  | R04109 | 1.2.1.70   | Glutamyl-tRNA reductase                                                     |
| CHLPC2S_h                      | 1.00  |        |            | Chlorophyll C2 synthase                                                     |
| MPML_h                         | 1.00  | R03877 | 6.6.1.1    | Mg-protoporphyrin IX magnesium-lyase                                        |
| MPMT_h                         | -1.00 | R04237 | 2.1.1.11   | S-adenosyl-L-methionine:Mg-protoporphyrin IX methyltransferase              |
| DVPCHLDR_h                     | 0.56  | R06896 | 1.3.1.75   | Divinylprotochlorophyllide vinyl-reductase                                  |
| PCHLDOR_h                      | 0.54  | R03845 | 1.3.1.33   | Protochlorophyllide oxidoreductase (light-dependent)                        |
| UPP3DC_h                       | 0.19  | R03197 | 4.1.1.37   | uroporphyrinogen decarboxylase (uroporphyrinogen III)                       |
| UPP3DC_c                       | 0.16  | R03197 | 4.1.1.37   | Uroporphyrinogen decarboxylase (uroporphyrinogen III)                       |
|                                |       |        |            |                                                                             |
| <b>Fatty acid biosynthesis</b> |       |        |            |                                                                             |
| 3OAS200_c                      | 1.00  | R09419 | 2.3.1.199  | very-long-chain 3-oxoacyl-CoA synthase (20:0 forming)                       |
| 3OAS220_c                      | 1.00  | R09419 | 2.3.1.199  | very-long-chain 3-oxoacyl-CoA synthase (22:0 forming)                       |
| 3OAS240_c                      | 1.00  | R09419 | 2.3.1.199  | very-long-chain 3-oxoacyl-CoA synthase (24:0 forming)                       |
| 3OAR200_c                      | 1.00  | R01779 | 1.1.1.330  | very-long-chain 3-oxoacyl-CoA reductase (20:0 forming)                      |

|                                                           |      |        |           |                                                                   |
|-----------------------------------------------------------|------|--------|-----------|-------------------------------------------------------------------|
| 3OAR220_c                                                 | 1.00 | R01779 | 1.1.1.330 | very-long-chain 3-oxoacyl-CoA reductase (22:0 forming)            |
| 3OAR240_c                                                 | 1.00 | R01779 | 1.1.1.330 | very-long-chain 3-oxoacyl-CoA reductase (24:0 forming)            |
| 3HAD200_c                                                 | 1.00 | R02685 | 4.2.1.134 | very-long-chain (3R)-3-hydroxyacyl-CoA dehydratase (20:0 forming) |
| 3HAD220_c                                                 | 1.00 | R02685 | 4.2.1.134 | very-long-chain (3R)-3-hydroxyacyl-CoA dehydratase (22:0 forming) |
| 3HAD240_c                                                 | 1.00 | R02685 | 4.2.1.134 | very-long-chain (3R)-3-hydroxyacyl-CoA dehydratase (24:0 forming) |
| EAR200_c                                                  | 1.00 | R09449 | 1.3.1.93  | very-long-chain enoyl-CoA reductase (20:0 forming)                |
| EAR220_c                                                  | 1.00 | R09449 | 1.3.1.93  | very-long-chain enoyl-CoA reductase (22:0 forming)                |
| EAR240_c                                                  | 1.00 | R09449 | 1.3.1.93  | very-long-chain enoyl-CoA reductase (24:0 forming)                |
|                                                           |      |        |           |                                                                   |
| <b>Amino acid metabolism: aminoacyl-tRNA biosynthesis</b> |      |        |           |                                                                   |
| CYSTL_c                                                   | 1.00 | R03650 | 6.1.1.16  | Cysteine-tRNA ligase                                              |
| ALATL_c                                                   | 1.00 | R03038 | 6.1.1.7   | Alanine-tRNA ligase                                               |
| LEUTL_c                                                   | 1.00 | R03657 | 6.1.1.4   | Leucine-tRNA ligase                                               |
| METTL_c                                                   | 1.00 | R03659 | 6.1.1.10  | Methionine-tRNA ligase                                            |
| TRPTL_c                                                   | 1.00 | R03664 | 6.1.1.2   | Tryptophane-tRNA ligase                                           |
| SERTL_c                                                   | 1.00 | R03662 | 6.1.1.11  | Serine-tRNA ligase                                                |
| GLUTL_h                                                   | 1.00 | R05578 | 6.1.1.17  | Glutamate-tRNA ligase                                             |
| GLUTL_c                                                   | 1.00 | R05578 | 6.1.1.17  | Glutamate-tRNA ligase                                             |
| ARGTL_c                                                   | 1.00 | R03646 | 6.1.1.19  | Arginine-tRNA ligase                                              |
| TYRTL_c                                                   | 1.00 | R02918 | 6.1.1.1   | Tyrosine-tRNA ligase                                              |
| ASNTL_c                                                   | 1.00 | R03648 | 6.1.1.22  | Asparagine-tRNA ligase                                            |
| LYSTL_c                                                   | 1.00 | R03658 | 6.1.1.6   | Lysine-tRNA ligase                                                |
| GLNTL_c                                                   | 1.00 | R03652 | 6.1.1.18  | Glutamine-tRNA ligase                                             |
| ASPTL_c                                                   | 1.00 | R05577 | 6.1.1.12  | Aspartate-tRNA ligase                                             |

|                                                                  |       |        |                     |                                                                                  |
|------------------------------------------------------------------|-------|--------|---------------------|----------------------------------------------------------------------------------|
| PHETL_c                                                          | 1.00  | R03660 | 6.1.1.20            | Phenylalanine-tRNA ligase                                                        |
| THRTL_c                                                          | 1.00  | R03663 | 6.1.1.3             | Threonine-tRNA ligase                                                            |
| GLYTL_c                                                          | 1.00  | R03654 | 6.1.1.14            | Glycine-tRNA ligase                                                              |
| SERTL_h                                                          | -0.16 | R03662 | 6.1.1.11            | Serine-tRNA ligase, chloroplast                                                  |
| <b>Amino acid metabolism: Cysteine and Methionine metabolism</b> |       |        |                     |                                                                                  |
| MTRK_c                                                           | 1.00  | R04143 | 2.7.1.100           | S-methyl-5-thioribose kinase                                                     |
| DKPPHL_c                                                         | 1.00  | R07395 | 3.1.3.77            | 2,3-Diketo-5-methylthiopentyl-1-phosphate phosphohydrolase                       |
| MTRI_c                                                           | 1.00  | R04420 | 5.3.1.23            | S-methyl-5-thioribose-1-phosphate isomerase                                      |
| MTAN_m                                                           | 1.00  | R01401 | 3.2.2.9<br>3.2.2.16 | methylthioadenosine nucleosidase - adenosylhomocysteine nucleosidase             |
| DH5MTPOXR_c                                                      | 1.00  | R07364 | 1.13.11.54          | 1,2-dihydroxy-5-(methylthio)pent-1-en-3-one:oxygen oxidoreductase                |
| MDRPD_c                                                          | 1.00  | R07392 | 4.2.1.109           | 5-Methylthio-5-deoxy-D-ribulose 1-phosphate dehydratase                          |
| TAL_m                                                            | 0.21  | R00996 | 4.3.1.19            | threonine ammonia-lyase                                                          |
| THRS_c                                                           | 0.20  | R01466 | 4.2.3.1             | threonine synthase                                                               |
| G3PAT140_h                                                       | 1.00  | R09380 | 2.3.1.15            | glycerol-3-phosphate: acyl-ACP acyltransferase (14:0)                            |
| AGPATACP_PALM_PALM_h                                             | 1.00  | R02241 | 2.3.1.51            | 1-Hexadecanoyl-sn-glycerol-3-phosphate O-acyltransferase (16:0) (ACP Substrate)  |
| PAPA_EPA_PALM_h                                                  | 1.00  | R02239 | 3.1.3.4             | Phosphatidate phosphatase(20:5(5Z,8Z,11Z,14Z,17Z)/16:0) chloroplast              |
| CDPDAGS_EPA_PALM_h                                               | 1.00  | R01799 | 2.7.7.41            | CDP-diacylglycerol synthase (20:5(5Z,8Z,11Z,14Z,17Z)/16:0) chloroplast           |
| G3PAT160_h                                                       | 1.00  | R09380 | 2.3.1.15            | glycerol-3-phosphate: acyl-ACP acyltransferase (16:0)                            |
| AGPATACP_MYRS_PALM_h                                             | 1.00  | R02241 | 2.3.1.51            | 1-Tetradecanoyl-sn-glycerol-3-phosphate O-acyltransferase (16:0) (ACP Substrate) |

|                                       |      |        |          |                                                                                                                      |
|---------------------------------------|------|--------|----------|----------------------------------------------------------------------------------------------------------------------|
| AGPATACP_EPA_PALM_h                   | 1.00 | R02241 | 2.3.1.51 | 1-5,8,11,14,17-Eicosapentaenoyl-sn-glycerol-3-phosphate O-acyltransferase (16:0) (ACP Substrate)                     |
| PAPA_MYRS_PALM_h                      | 1.00 | R02239 | 3.1.3.4  | Phosphatidate phosphatase(14:0/16:0) chloroplast                                                                     |
| SQDGS_MYRS_PALM_h                     | 1.00 |        |          | Sulfoquinovosyldiacylglycerol synthase(14:0/16:0)                                                                    |
| SQDGS_EPA_PALM_h                      | 1.00 |        |          | Sulfoquinovosyldiacylglycerol synthase(20:5(5Z,8Z,11Z,14Z,17Z)/16:0)                                                 |
| SQDGS_PALM_PALM_h                     | 1.00 |        |          | Sulfoquinovosyldiacylglycerol synthase(16:0/16:0)                                                                    |
| SQDGS_HDE_TTC_c                       | 1.00 |        |          | Sulfoquinovosyldiacylglycerol synthase(16:1(9Z)/24:0)                                                                |
| ASQ_EPA_PALM_2OEPA_h                  | 1.00 |        |          | Sulfoquinovosyl diacylglycerol-2-O-acyl transferase (20:5(5Z,8Z,11Z,14Z,17Z)/16:0)(SQDG-2-O-20:5(5Z,8Z,11Z,14Z,17Z)) |
| <b>Phosphoglycerolipid metabolism</b> |      |        |          |                                                                                                                      |
| PGPP_EPA_PALM_h                       | 1.00 | R02029 | 3.1.3.27 | Phosphatidylglycerol phosphate phosphatase (20:5(5Z,8Z,11Z,14Z,17Z)/16:0) chloroplast                                |
| PGD3TDS_EPA_HDE3T_h                   | 1.00 |        |          | Phosphatidylglycerol sn-2 palmitoyl delta 3 desaturase (20:5(5Z,8Z,11Z,14Z,17Z)/16:1(3E)) chloroplast                |
| AGPATCOA_HDE_TTC_c                    | 1.00 | R02241 | 2.3.1.51 | 1-9-hexadecenoyl-sn-glycerol-3-phosphate O-acyltransferase (24:0) (CoA Substrate)                                    |
| PAPA_HDE_TTC_c                        | 1.00 | R02239 | 3.1.3.4  | Phosphatidate phosphatase (16:1(9Z)/24:0)                                                                            |
| PGPS_EPA_PALM_h                       | 1.00 | R01801 | 2.7.8.5  | Phosphatidylglycerol phosphate synthetase (20:5(5Z,8Z,11Z,14Z,17Z)/16:0) chloroplast                                 |
| PAPA_PALM_PALM_h                      | 1.00 | R02239 | 3.1.3.4  | Phosphatidate phosphatase (16:0/16:0)                                                                                |
| UDPSQS_h                              | 1.00 | R05775 | 3.13.1.1 | UDP-sulfoquinovose synthase                                                                                          |



|                    |      |        |           |                                                                             |
|--------------------|------|--------|-----------|-----------------------------------------------------------------------------|
| CDIPT_HDE_PALM_c   | 0.18 | R01802 | 2.7.8.11  | CDP-diacylglycerol: myo-inositol 3-phosphatidyl transferase (16:1(9Z)/16:0) |
| CDPDAGS_HDE_PALM_c | 0.18 | R01799 | 2.7.7.41  | CDP-diacylglycerol synthase(16:1(9Z)/16:0)                                  |
| DAGK_HDE_PALM_c    | 0.14 | R02240 | 2.7.1.107 | Diacylglycerol kinase(16:1(9Z)/16:0)                                        |
| ACPT_EPA_EPA_c     | 1.00 |        |           | Betaine lipid synthase<br>(20:5(5Z,8Z,11Z,14Z,17Z)/20:5(5Z,8Z,11Z,14Z,17Z)) |
| BPNT_c             | 1.00 | R00188 | 3.1.3.7   | 3",5"-Bisphosphate nucleotidase (pap)                                       |
